# Supplementary material for: Infrequent and incomplete registration of test accuracy studies: analysis of recent study reports
Source: PubMed Central journal article supplement — BMJ Open. 2014 Jan 30;4(1):e004596. doi: 10.1136/bmjopen-2013-004596 (PMC3913028; doi:10.1136/bmjopen-2013-004596), 2014-01-30
Supplement: bmjopen-2013-004596.draft_revisions.pdf [file bmjopen-2013-004596.draft_revisions.pdf]

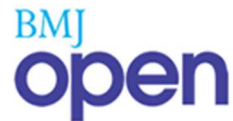

## Infrequent and Incomplete Registration of Test Accuracy Studies: Analysis of Recent Study Reports

|                                 |                                                                                                                                                                                                                                                                                                                                                                |
|---------------------------------|----------------------------------------------------------------------------------------------------------------------------------------------------------------------------------------------------------------------------------------------------------------------------------------------------------------------------------------------------------------|
| Journal:                        | <i>BMJ Open</i>                                                                                                                                                                                                                                                                                                                                                |
| Manuscript ID:                  | bmjopen-2013-004596                                                                                                                                                                                                                                                                                                                                            |
| Article Type:                   | Research                                                                                                                                                                                                                                                                                                                                                       |
| Date Submitted by the Author:   | 02-Dec-2013                                                                                                                                                                                                                                                                                                                                                    |
| Complete List of Authors:       | Korevaar, Daniël; Academic Medical Center; University of Amsterdam, Dept. Clinical Epidemiology and Biostatistics<br>Bossuyt, Patrick; Academic Medical Center; University of Amsterdam, Dept. Clinical Epidemiology and Biostatistics<br>Hooft, Lotty; Academic Medical Center; University of Amsterdam, Netherlands Trial Register and Dutch Cochrane Centre |
| <b>Primary Subject Heading</b>: | Research methods                                                                                                                                                                                                                                                                                                                                               |
| Secondary Subject Heading:      | Evidence based practice, Medical publishing and peer review                                                                                                                                                                                                                                                                                                    |
| Keywords:                       | EPIDEMIOLOGY, GENERAL MEDICINE (see Internal Medicine), Protocols & guidelines < HEALTH SERVICES ADMINISTRATION & MANAGEMENT                                                                                                                                                                                                                                   |
|                                 |                                                                                                                                                                                                                                                                                                                                                                |

SCHOLARONE™  
Manuscripts

1  
2  
3 **Infrequent and Incomplete Registration of Test Accuracy Studies: Analysis of Recent**  
4 **Study Reports**  
5

6  
7  
8 Authors: Daniël A. Korevaar, Patrick M.M. Bossuyt, Lotty Hooft.  
9

10  
11 Daniël A. Korevaar, MD (corresponding author).  
12

13 Department of Clinical Epidemiology, Biostatistics and Bioinformatics (KEBB), Academic  
14 Medical Centre (AMC), University of Amsterdam (UvA), Meibergdreef 9, 1105 AZ,  
15 Amsterdam, the Netherlands.  
16

17  
18 E-mail: d.a.korevaar@amc.uva.nl

19  
20 Phone: 0031 20566 1099

21  
22 Fax: 0031 20691 2683  
23

24  
25 Patrick M.M. Bossuyt, PhD.

26 Department of Clinical Epidemiology, Biostatistics and Bioinformatics (KEBB), Academic  
27 Medical Centre (AMC), University of Amsterdam (UvA), Amsterdam, the Netherlands.  
28  
29

30  
31 Lotty Hooft, PhD.

32  
33 Netherlands Trial Register and Dutch Cochrane Centre (DCC), Academic Medical Centre  
34 (AMC), University of Amsterdam (UvA), Amsterdam, the Netherlands.  
35  
36

37  
38 **Keywords:** Trial registration, Publication bias, Outcome reporting bias.  
39

40  
41 **Word count:** 2841  
42  
43  
44  
45  
46  
47  
48  
49  
50  
51  
52  
53  
54  
55  
56  
57  
58  
59  
60

## ABSTRACT

**Objectives:** To identify the proportion of articles reporting on test accuracy for which the corresponding study had been registered.

**Design:** Analysis of a consecutive sample of published study reports.

**Participants:** PubMed was searched for publications in journals with an impact factor of 5 or higher in May and June 2012. Articles were included if they reported on original studies evaluating the accuracy of one or more diagnostic or prognostic tests or markers against a clinical reference standard in humans. We found 1,941 references; 351 fulfilled the inclusion criteria.

**Primary and secondary outcome measures:** Primary outcome was the proportion of test accuracy studies that had been registered. Secondary outcomes were study characteristics associated with registration.

**Results:** The data collection of 52 studies (15%) had been registered. Of these, 27 (52%) provided a registration number in the publication, and 12 (23%) provided a reference to the publication in the registry. Registration rates were similar for studies on diagnostic versus those on prognostic tests, and among studies on imaging tests versus those on laboratory techniques. Studies reporting some form of industry involvement were more often registered (33%) than studies reporting another source of funding (11%), and studies without a (reported) source of (external) funding (9%;  $p < 0.001$ ). Of the registered studies, 8 (15%) had been registered after completion, 14 were registered before initiation (27%), and 30 (58%) between initiation and completion. Only 16 (31%; 5% of the total sample) had registered the published primary outcomes before completion.

**Conclusions:** Few test accuracy studies published in higher impact journals are registered. Only one in twenty-two of such studies register their primary outcomes before study completion. Because the reasons for registering studies that investigate medical interventions also apply to test accuracy studies, prospective study registration of these studies should be further promoted among investigators and journal editors.

**ARTICLE SUMMARY****Strengths and limitations of this study**

- Forty-two percent of the corresponding authors participated in our survey.
- As test accuracy studies often do not report the study completion date, we may have included studies completed before 2005, when ICMJE's registration policy was launched.
- Only papers with an impact factor of 5 or higher were included; registration rates may differ for study reports in in lower-impact journals.

For peer review only

## INTRODUCTION

Since September 2005, the International Committee of Medical Journal Editors (ICMJE) requires researchers to register essential information about the design of their randomised controlled trials, before initiation, in a publicly available trial registry<sup>1</sup>. By facilitating transparency and completeness of reporting, this policy forms an important measure in preventing negative effects of publication bias and outcome reporting bias, defined as the non-publication and selective reporting of research findings depending on the strength and direction of outcomes<sup>2,3</sup>. This policy improves the evidence base on which clinical decisions are made. Furthermore, duplication of research efforts can be prevented, research and knowledge gaps can be identified, collaboration can be facilitated, and a more efficient allocation of research funds can be promoted. Full disclosure of study material may also be an ethical obligation, especially to human study participants and future patients.

The ICMJE required registration of “any research project that prospectively assigns human subjects to intervention and comparison groups to study the cause-and-effect relationship between a medical intervention and a health outcome”<sup>4</sup>. The reasons for registration also apply to studies quantifying the accuracy of diagnostic and prognostic tests and markers<sup>5</sup>, especially since failure to publish and selective reporting may also be prevalent among these studies<sup>6,7</sup>. Approval and proper usage of medical tests should be based on a thorough scientific evaluation<sup>8</sup>. Test accuracy studies form an essential part in this process. Such studies evaluate the ability of a test to correctly differentiate between patients with and without a target condition. This can be a disease (screening or diagnosis), a disease stage (staging), a condition in the near future (monitoring and surveillance), response or benefit from therapy (predictive), or an event in the future (prognosis).

At present, many clinical trial registries also include studies that do not fall under ICMJE’s registration requirement. Although controversial<sup>9-11</sup>, increasing numbers of observational studies are also being registered<sup>12</sup>. This is illustrated by the fact that 19% out of 156,143 records in ClinicalTrials.gov, one of the major trial registries, are tagged as observational (accessed November 27, 2013). Increasing numbers of test accuracy studies seem to be registered as well. Although most of these studies can be considered as interventional, their results usually only indirectly contribute to changes in health outcomes. Therefore, ICMJE’s registration requirement seems to exclude most test accuracy studies. The Food and Drug Administration (FDA), however, requires registration of “controlled trials with health outcomes of devices subject to FDA regulation, other than small feasibility

1  
2  
3 studies<sup>13</sup>. According to this definition, one may argue also studies that indirectly contribute  
4 to health outcomes, including many test accuracy studies, should be registered.  
5

6 The primary aim of this study was to identify the proportion of articles reporting on  
7 test accuracy studies for which the corresponding study had been registered, to evaluate  
8 whether registration had preceded study initiation, and to assess whether registration included  
9 the published primary outcome measures.  
10  
11  
12  
13  
14  
15  
16  
17  
18  
19  
20  
21  
22  
23  
24  
25  
26  
27  
28  
29  
30  
31  
32  
33  
34  
35  
36  
37  
38  
39  
40  
41  
42  
43  
44  
45  
46  
47  
48  
49  
50  
51  
52  
53  
54  
55  
56  
57  
58  
59  
60

## METHODS

### Search

A sample of test accuracy studies was identified by searching PubMed (National Library of Medicine). We searched for studies published in journals with an impact factor of 5 or higher in May and June 2012. A previously validated search filter for test accuracy studies ("sensitivity AND specificity.sh" OR "specificit\*.tw" OR "false negative.tw" OR "accuracy.tw" (where ".sh" indicates subject heading and ".tw" indicates text word))<sup>14</sup> was combined with a list of names and corresponding international standard serial numbers (ISSN) of the 536 journals with an impact factor of 5 or higher in 2011. The final search was performed on February 25th, 2013.

Articles were included if they reported on studies evaluating the accuracy of one or more tests or markers against a clinical reference standard in human subjects. Tests for screening, diagnosis, staging, monitoring, prediction, or prognosis were all eligible. We limited our search to papers published in English that had an abstract. We excluded studies that did not report an accuracy measure (sensitivity, specificity, likelihood ratio, positive or negative predictive value, diagnostic odds ratio, area under operator curve, or c-index), as well as commentaries, discussion articles, and systematic reviews.

One author (DK) scanned the search results to identify potentially eligible articles. Studies that did not provide an accuracy measure in their abstract, but were deemed likely to publish one in their full-text, were also tagged as potentially eligible. The full text was then obtained to evaluate whether the study met the inclusion criteria. Two authors (DK, and PB or LH) independently evaluated the potentially eligible articles. Disagreements were resolved through discussion.

Included studies were classified as diagnostic studies, which evaluated the ability of a test to identify a current ((pre-)stage of) disease, or prognostic studies, which used a follow-up period to evaluate the ability of a test to predict a future state or event. Based on the test under investigation, included studies were tagged as imaging studies, laboratory studies, or other. Laboratory studies included all measurements on body fluids or tissues, except for histology and cytology (which were classified as "other"). We extracted the funding sources from the full publication. Studies that clearly described a source of support were categorized into those reporting some form of industry involvement and those reporting sources of funding not including an industrial party. Studies that did not report a source of support, or only indicated that "no external funding" was obtained, were categorized as "no (external) funding reported".

### Identifying registration

The following steps were taken to find out if a study had been registered. First, the full text of the included articles was checked for a trial registration number. When this number was not reported, the corresponding author was asked through email whether the study had been registered and, if so, in which registry and under which registration number. Contact attempts were limited to three emails, each sent a week apart. If no answer was received, the World Health Organization Search Portal, which searches several registries, was used. In addition, we searched ClinicalTrials.gov, the International Standard Randomized Controlled Trial Number Register, and national trial registers of the country of the first author. In these registries, we searched for the names of first, last and corresponding authors, publication title, evaluated tests, and target disease/outcome. We matched registered records with publications by comparing data on study design, sample size, country, outcomes and contact information. If no registration number was found, a study was considered as not registered. When a paper included in our review was a secondary (post-hoc) analysis, we also considered the study as registered if we were able to identify a registered record for the initial study, in which the data had been collected. We categorized studies as those where the data collection had, and those where the data collection had not been registered. We further classified studies with a registered data collection as those that had registered the published primary outcomes, those that had registered the published primary aim but much more vague or slightly different, and those that had not registered the primary outcomes or aims.

The following data were collected from the registry. First we checked whether the study had been registered before its initiation by comparing the registration date with the start and completion dates of participant enrolment as reported in the registry. Registration was defined as before initiation if the date of registration fell in or preceded the month of the study's start date as reported in the registry. A study was considered as registered after completion if it had been registered in the same month as, or after the registered completion date. All other studies were considered as registered in-between initiation and completion. We also compared the published report with the registered record to find out in the published primary outcome had been registered.

### Statistical analysis



1  
2  
3 Data are reported as frequencies and percentages. We used chi-square tests to evaluate  
4 associations between study characteristics and the chances of being registered for statistical  
5 significance. Data were analyzed using SPSS version 20.0.  
6  
7  
8  
9  
10  
11  
12  
13  
14  
15  
16  
17  
18  
19  
20  
21  
22  
23  
24  
25  
26  
27  
28  
29  
30  
31  
32  
33  
34  
35  
36  
37  
38  
39  
40  
41  
42  
43  
44  
45  
46  
47  
48  
49  
50  
51  
52  
53  
54  
55  
56  
57  
58  
59  
60

For peer review only

## RESULTS

The search identified 1,941 articles of which 351 fulfilled the inclusion criteria (Figure 1). Characteristics of included studies are summarized in Table 1. The majority of studies (71%) evaluated the accuracy of a diagnostic test, while 29% evaluated a prognostic test. Equal numbers of studies focused on imaging tests as on tests based on a laboratory technique: 33% and 36% respectively. The remainder focussed on another type of test (24%), such as physical examination, electrocardiography or pathology, or on (a combination of) tests that were assigned to more than one category (8%). Some form of industry involvement was reported by 19% of the included studies, while 58% reported sources of funding that did not include an industrial party. The remainder (23%) did not have or report an (external) source of funding.

The data collection had been registered in 52 of 351 studies (15%). Of these, 27 provided a registration number in the final publication. We contacted the authors of 324 studies without a registration number in their publication and 187 (58%) responded, providing another 14 registration numbers. Non-registration was confirmed by the authors of 173 studies. We searched the registries for the remaining 137 studies and identified another 11 registered records.

Of the 52 registered studies, 27% had been registered before initiation (Table 2). The other studies were registered somewhere between the start and completion date (58%), or after the completion date (15%). Only 23% of the registered studies provided a reference to the full-publication in the registered record.

The proportion of registered studies for subgroups defined by study characteristics is shown in Table 1. There was no significant difference between diagnostic and prognostic test studies, nor between imaging and laboratory studies. Of the studies reporting some form of industry involvement, 33% had been registered. This was significantly more often than studies reporting another source of funding (11%), and studies without a (reported) source of funding (9%;  $p < 0.001$ ).

Only 16 (31%) registered studies had registered the published primary outcomes before the completion date. Among another 12 (23%), the published primary aim had been registered before the completion date, but it was described much more vaguely or slightly differently. Of the remaining studies, the published primary outcome or aim was not registered before study completion, or not registered at all. However, the majority of the latter group consisted of post-hoc analyses in which the authors had used data from a registered, previously completed, study, or the publication reported a small sub-study part of a larger registered project.

## DISCUSSION

Using a previously validated sensitive search filter, we found that the data collection of only fifteen percent of diagnostic and prognostic test accuracy studies published in journals with an impact factor of 5 or higher in May and June 2012 had been registered. Registration rates were comparable between studies of diagnostic and those of prognostic tests, and among studies of imaging tests and those on laboratory tests. However, studies reporting some industry involvement were registered more often than studies with other sources of funding, and studies without reported funding sources. Adequate assessment of selective reporting among registered test accuracy studies proved difficult: only a quarter of the registered studies – four percent of all published studies – had been registered before initiation, and only one third of the registered studies – five percent of all published studies – had registered the published primary outcomes before the study completion date. About half of the registered studies reported a trial registration number in the publication, and a reference to the final publication was reported by a quarter of the registered studies.

Our study has some potential limitations. We only searched for test accuracy studies published in journals with an impact factor of 5 or higher. It is possible that studies published in these journals are of higher quality than those published in lower impact journals, and higher quality studies may be more likely to be registered.

We may have included studies initiated before 2005, when study registration was largely unknown among researchers. We were unable to exclude these because many test accuracy studies do not report their start and ending dates<sup>15;16</sup>. However, since we only included studies that were published halfway 2012, 7 years after the International Committee of Medical Journal Editors' (ICMJE) registration policy was launched, we expect this number to be negligible.

Although response rates to our email survey were relatively good, 42% of the study authors did not reply. We thoroughly searched several registries to identify a corresponding registration for these studies but may have missed some, especially since searching in most registries proves to be difficult, as extended search options are lacking. We included studies independent of their study design and type of data collection. We decided to do so because we wanted our study cohort to give a fair presentation of all types of test accuracy studies, and because of the inherent difficulties in categorizing test accuracy studies, due to scarce and substandard reporting<sup>15-17</sup>. For example, many test accuracy studies do not report whether the study is prospective or retrospective<sup>15;16</sup>.

1  
2  
3 Why are these results disappointing and promising at the same time? The results of our  
4 study indicate that, at this point, study registration for test accuracy studies does not provide  
5 many advantages. The number of registered studies is low, published primary outcomes are  
6 often not adequately registered, not registered in an informative way, and many registered  
7 studies are not registered before initiation. In addition, registration numbers are often not  
8 reported in the final publication, making it hard to find out if a study has been registered.  
9 References to the published study are often not reported in the registry, which does not  
10 facilitate finding out if a registered study has been published. We acknowledge that  
11 prospective registration of test accuracy studies is currently not an officially required by the  
12 ICMJE. The fact that a considerable number of authors of these studies already seem to  
13 endorse the necessity of study registration is promising.

14  
15  
16 Non-publication and selective reporting jeopardize evidence-based medicine mainly  
17 through skewed literature syntheses. Unpublished research results are not easy to find and  
18 include in a systematic review, and this may lead to faulty conclusions based on an  
19 incomplete evidence base. Selective reporting may generate bias, offering a too optimistic  
20 presentation of test performance. Both are widely recognized problems, especially among  
21 randomized controlled trials. Evidence of cohorts of studies registered in ClinicalTrials.gov  
22 suggests that only between 46% and 63% gets published<sup>18,19</sup>. Studies with positive or  
23 favourable results are more likely to be published than those with negative or disappointing  
24 ones<sup>20</sup>. Although formal evidence is scarce, these phenomena are also suspected to be  
25 prevalent among test accuracy studies<sup>5,6</sup>. This threatens patient safety, since premature or  
26 inaccurate adoption of a test into clinical practice may lead to inadequate medical decision  
27 making. Patients may be subjected to the side effects of unnecessary medical interventions  
28 based on a wrong diagnosis, or withdrawn from an intervention based on an erroneous  
29 prognosis. In addition, tests may have potential side-effects and complications, such as  
30 radiation exposure in imaging tests, or aspiration pneumonia after bronchoscopy. Therefore  
31 we would like to recommend further research to evaluate the extent, drivers and implications  
32 of non-publication and selective reporting among test accuracy studies. An obvious method  
33 would be to follow-up a cohort of IRB approved protocols of test accuracy studies. This way,  
34 (determinants of) non-publication can be identified and original protocols can be compared  
35 with final publications to identify discrepancies.

36  
37  
38 We also strongly recommend that authors of test accuracy studies register their studies  
39 before initiation, and that journal editors start to think about expanding required registration to  
40 this type of research. An important question that should be addressed before such a  
41  
42  
43  
44  
45  
46  
47  
48  
49  
50  
51  
52  
53  
54  
55  
56  
57  
58  
59  
60

1  
2  
3 requirement can be implemented is whether this should apply to any study on test accuracy, or  
4 only to those with specific study designs. The recent announcement of *Lancet* and the *British*  
5 *Medical Journal* that they would encourage researchers to register observational studies in a  
6 manner similar to what has become requirement for clinical trials caused some disapproving  
7 reactions<sup>11;21;22</sup>. Criticism especially focused on the fact that observational studies vary widely  
8 in their design, and that prospective registration is not as useful for one type of study as it is  
9 for the other<sup>23</sup>. Some of these design issues also apply to test accuracy studies. Study data can  
10 be collected prospectively or retrospectively, and study aims, hypotheses and protocols can be  
11 formulated before or after the analysis of the data. All the reasons for registering clinical trials  
12 seem to equally apply to protocol-driven test accuracy studies with a-priori defined aims,  
13 irrespective of whether their data collection was prospective or retrospective. Some test  
14 accuracy studies, however, are exploratory in nature. Such studies often do not have a pre-  
15 defined protocol or hypothesis, and existing data-sets are used to explore potentially  
16 interesting findings. The benefits of study registration are not as clear for such studies. For  
17 example, although non-publication and selective reporting are likely to be prevalent among  
18 exploratory studies, it would be impossible to determine whether the study has been registered  
19 before the post-hoc hypothesis was formulated. In addition, the bureaucratic load of  
20 registering every post-hoc analysis would be enormous and probably outweigh the benefits.  
21 We believe that at least all protocol-driven test accuracy studies with a-priori defined aims  
22 should be registered.  
23  
24  
25  
26  
27  
28  
29  
30  
31  
32  
33  
34  
35  
36  
37  
38  
39  
40  
41  
42  
43  
44  
45  
46  
47  
48  
49  
50  
51  
52  
53  
54  
55  
56  
57  
58  
59  
60

## ACKNOWLEDGEMENTS

We thank René Spijker, MSc (Dutch Cochrane Centre, University of Amsterdam) for assisting with the searches of this project.

### **Authors' contributions:**

DK developed the study design in consultation with PB and LH. DK, PB and LH performed the study selection. DK analyzed the data in consultation with PB and LH.

### **Data sharing:**

Full dataset and statistical code available from the corresponding author at [d.a.korevaar@amc.uva.nl](mailto:d.a.korevaar@amc.uva.nl).

## COMPETING INTERESTS

All authors have completed the ICMJE uniform disclosure form [www.icmje.org/coi\\_disclosure.pdf](http://www.icmje.org/coi_disclosure.pdf) and declare: no support from any organisation for the submitted work; no financial relationships with any organisations that might have an interest in the submitted work in the previous three years; no other relationships or activities that could appear to have influenced the submitted work.

## FUNDING

No external funding.

## REFERENCES

- 1  
2  
3  
4  
5 (1) DeAngelis CD, Drazen JM, Frizelle FA, Haug C, Hoey J, Horton R et al. Clinical trial  
6 registration: a statement from the International Committee of Medical Journal Editors.  
7 *JAMA* 2004; 292(11):1363-1364.  
8
- 9  
10 (2) Dickersin K. The existence of publication bias and risk factors for its occurrence.  
11 *JAMA* 1990; 263(10):1385-1389.  
12
- 13 (3) Sutton AJ, Egger M, Moher D. Addressing reporting biases. Cochrane Handbook for  
14 Systematic Reviews of Interventions ed. Chichester (UK): John Wiley & Sons; 2008.  
15
- 16 (4) De Angelis CD, Drazen JM, Frizelle FA, Haug C, Hoey J, Horton R et al. Is this  
17 clinical trial fully registered?--A statement from the International Committee of  
18 Medical Journal Editors. *N Engl J Med* 2005; 352(23):2436-2438.  
19
- 20 (5) Hooft L, Bossuyt PM. Prospective registration of marker evaluation studies: time to  
21 act. *Clin Chem* 2011; 57(12):1684-1686.  
22
- 23 (6) Brazzelli M, Lewis SC, Deeks JJ, Sandercock PA. No evidence of bias in the process  
24 of publication of diagnostic accuracy studies in stroke submitted as abstracts. *J Clin*  
25 *Epidemiol* 2009; 62(4):425-430.  
26
- 27 (7) Rifai N, Altman DG, Bossuyt PM. Reporting bias in diagnostic and prognostic  
28 studies: time for action. *Clin Chem* 2008; 54(7):1101-1103.  
29
- 30 (8) Moons KG, de Groot JA, Linnet K, Reitsma JB, Bossuyt PM. Quantifying the added  
31 value of a diagnostic test or marker. *Clin Chem* 2012; 58(10):1408-1417.  
32
- 33 (9) The registration of observational studies--when metaphors go bad. *Epidemiology*  
34 2010; 21(5):607-609.  
35
- 36 (10) Lash TL. Preregistration of study protocols is unlikely to improve the yield from our  
37 science, but other strategies might. *Epidemiology* 2010; 21(5):612-613.  
38
- 39 (11) Vandenbroucke JP. Registering observational research: second thoughts. *Lancet* 2010;  
40 375(9719):982-983.  
41
- 42 (12) Williams RJ, Tse T, Harlan WR, Zarin DA. Registration of observational studies: is it  
43 time? *CMAJ* 2010; 182(15):1638-1642.  
44
- 45 (13) Food and Drug Administration Amendments Act of 2007.  
46
- 47 (14) Deville WL, Bezemer PD, Bouter LM. Publications on diagnostic test evaluation in  
48 family medicine journals: an optimal search strategy. *J Clin Epidemiol* 2000;  
49 53(1):65-69.  
50
- 51 (15) Smidt N, Rutjes AW, van der Windt DA, Ostelo RW, Bossuyt PM, Reitsma JB et al.  
52 The quality of diagnostic accuracy studies since the STARD statement: has it  
53 improved? *Neurology* 2006; 67(5):792-797.  
54  
55  
56  
57  
58  
59  
60

- 1  
2  
3 (16) Wilczynski NL. Quality of reporting of diagnostic accuracy studies: no change since  
4 STARD statement publication--before-and-after study. *Radiology* 2008; 248(3):817-  
5 823.  
6  
7 (17) Fontela PS, Pant PN, Schiller I, Dendukuri N, Ramsay A, Pai M. Quality and  
8 reporting of diagnostic accuracy studies in TB, HIV and malaria: evaluation using  
9 QUADAS and STARD standards. *PLoS One* 2009; 4(11):e7753.  
10  
11 (18) Bourgeois FT, Murthy S, Mandl KD. Outcome reporting among drug trials registered  
12 in ClinicalTrials.gov. *Ann Intern Med* 2010; 153(3):158-166.  
13  
14 (19) Ross JS, Mulvey GK, Hines EM, Nissen SE, Krumholz HM. Trial publication after  
15 registration in ClinicalTrials.Gov: a cross-sectional analysis. *PLoS Med* 2009;  
16 6(9):e1000144.  
17  
18 (20) Song F, Parekh-Bhurke S, Hooper L, Loke YK, Ryder JJ, Sutton AJ et al. Extent of  
19 publication bias in different categories of research cohorts: a meta-analysis of  
20 empirical studies. *BMC Med Res Methodol* 2009; 9:79.  
21  
22 (21) Loder E, Groves T, Macauley D. Registration of observational studies. *BMJ* 2010;  
23 340:c950.  
24  
25 (22) Should protocols for observational research be registered? *Lancet* 2010;  
26 375(9712):348.  
27  
28 (23) Chavers S, Fife D, Wacholtz M, Stang P, Berlin J. Registration of Observational  
29 Studies: perspectives from an industry-based epidemiology group.  
30 *Pharmacoepidemiol Drug Saf* 2011; 20(10):1009-1013.  
31  
32  
33  
34  
35  
36  
37  
38  
39  
40  
41  
42  
43  
44  
45  
46  
47  
48  
49  
50  
51  
52  
53  
54  
55  
56  
57  
58  
59  
60



**Table 1.** Characteristics of included studies and the distribution of registered studies among different characteristics.

|                                              |                           | <b>Number</b>  | <b>Registered</b> |
|----------------------------------------------|---------------------------|----------------|-------------------|
| <b>Aim of study</b>                          | Diagnostic                | 248 (71%)      | 38 (15%)          |
|                                              | Prediction                | 103 (29%)      | 14 (14%)          |
| <b>Type of test evaluated</b>                | Imaging                   | 114 (33%)      | 22 (19%)          |
|                                              | Laboratory technique      | 126 (36%)      | 21 (17%)          |
|                                              | Other                     | 83 (24%)       | 6 (7%)            |
|                                              | Combination of categories | 28 (8%)        | 3 (11%)           |
| <b>Funding</b>                               | Industry-involvement      | 67 (19%)       | 22 (33%)          |
|                                              | Other source of funding   | 203 (58%)      | 23 (11%)          |
|                                              | No funding (reported)     | 81 (23%)       | 7 (9%)            |
| <b>Journal impact factor, median (range)</b> |                           | 6.4 (5.0-53.3) | 6.0 (5.1-38.3)    |
| <b>Total</b>                                 |                           | 351            | 52 (15%)          |

The third column shows numbers and percentages of the total of included studies in parentheses. The second column shows numbers and percentages of the total per category in parentheses.

**Table 2.** Characteristics of registered studies.

|                                                                                 |                   | <b>Total</b><br>N=52 |
|---------------------------------------------------------------------------------|-------------------|----------------------|
| <b>Registration:</b>                                                            | Before initiation | 14 (27%)             |
|                                                                                 | In-between        | 30 (58%)             |
|                                                                                 | After completion  | 8 (15%)              |
| <b>Registration number reported</b>                                             |                   | 27 (52%)             |
| <b>Reference to full-publication provided in registry</b>                       |                   | 12 (23%)             |
| <b>Published primary outcomes registered clearly and before completion date</b> |                   | 16 (31%)             |

For peer review only

1  
2  
3 **Figure 1.** Flowchart, showing how the papers entered the study.  
4  
5  
6  
7  
8  
9  
10  
11  
12  
13  
14  
15  
16  
17  
18  
19  
20  
21  
22  
23  
24  
25  
26  
27  
28  
29  
30  
31  
32  
33  
34  
35  
36  
37  
38  
39  
40  
41  
42  
43  
44  
45  
46  
47  
48  
49  
50  
51  
52  
53  
54  
55  
56  
57  
58  
59  
60

For peer review only

1  
2  
3  
4  
5  
6  
7  
8  
9  
10  
11  
12  
13  
14  
15  
16  
17  
18  
19  
20  
21  
22  
23  
24  
25  
26  
27  
28  
29  
30  
31  
32  
33  
34  
35  
36  
37  
38  
39  
40  
41  
42  
43  
44  
45  
46  
47  
48  
49  
50  
51  
52  
53  
54  
55  
56  
57  
58  
59  
60

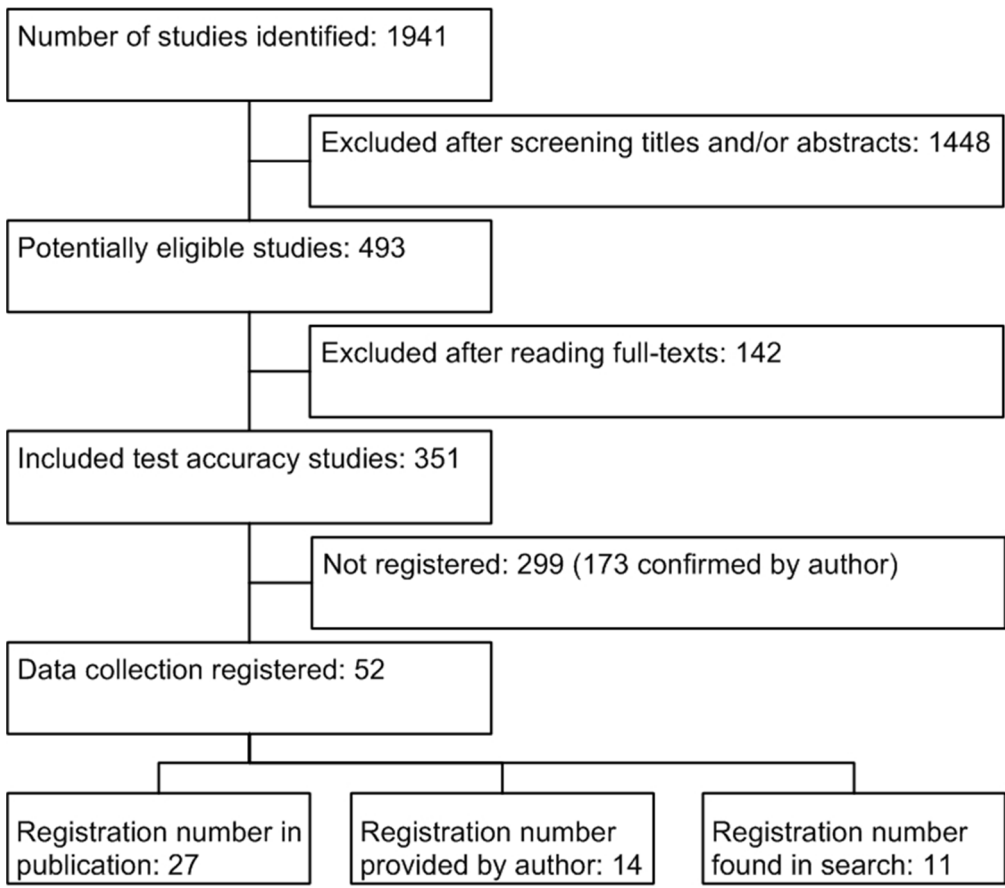

Flowchart, showing how the papers entered the study.  
99x94mm (200 x 200 DPI)

only



## Infrequent and Incomplete Registration of Test Accuracy Studies: Analysis of Recent Study Reports

|                                 |                                                                                                                                                                                                                                                                                                                                                                |
|---------------------------------|----------------------------------------------------------------------------------------------------------------------------------------------------------------------------------------------------------------------------------------------------------------------------------------------------------------------------------------------------------------|
| Journal:                        | <i>BMJ Open</i>                                                                                                                                                                                                                                                                                                                                                |
| Manuscript ID:                  | bmjopen-2013-004596.R1                                                                                                                                                                                                                                                                                                                                         |
| Article Type:                   | Research                                                                                                                                                                                                                                                                                                                                                       |
| Date Submitted by the Author:   | 14-Dec-2013                                                                                                                                                                                                                                                                                                                                                    |
| Complete List of Authors:       | Korevaar, Daniël; Academic Medical Center; University of Amsterdam, Dept. Clinical Epidemiology and Biostatistics<br>Bossuyt, Patrick; Academic Medical Center; University of Amsterdam, Dept. Clinical Epidemiology and Biostatistics<br>Hooft, Lotty; Academic Medical Center; University of Amsterdam, Netherlands Trial Register and Dutch Cochrane Centre |
| <b>Primary Subject Heading</b>: | Research methods                                                                                                                                                                                                                                                                                                                                               |
| Secondary Subject Heading:      | Evidence based practice, Medical publishing and peer review                                                                                                                                                                                                                                                                                                    |
| Keywords:                       | EPIDEMIOLOGY, GENERAL MEDICINE (see Internal Medicine), Protocols & guidelines < HEALTH SERVICES ADMINISTRATION & MANAGEMENT                                                                                                                                                                                                                                   |
|                                 |                                                                                                                                                                                                                                                                                                                                                                |

SCHOLARONE™  
Manuscripts

1  
2  
3 **Infrequent and Incomplete Registration of Test Accuracy Studies: Analysis of Recent**  
4 **Study Reports**  
5

6  
7  
8 Authors: Daniël A. Korevaar, Patrick M.M. Bossuyt, Lotty Hooft.  
9

10  
11 Daniël A. Korevaar, MD (corresponding author).  
12

13 Department of Clinical Epidemiology, Biostatistics and Bioinformatics (KEBB), Academic  
14 Medical Centre (AMC), University of Amsterdam (UvA), Meibergdreef 9, 1105 AZ,  
15  
16 Amsterdam, the Netherlands.  
17

18 E-mail: d.a.korevaar@amc.uva.nl  
19

20 Phone: 0031 20566 1099  
21

22 Fax: 0031 20691 2683  
23

24  
25 Patrick M.M. Bossuyt, PhD.

26 Department of Clinical Epidemiology, Biostatistics and Bioinformatics (KEBB), Academic  
27 Medical Centre (AMC), University of Amsterdam (UvA), Amsterdam, the Netherlands.  
28  
29

30  
31 Lotty Hooft, PhD.

32 Netherlands Trial Register and Dutch Cochrane Centre (DCC), Academic Medical Centre  
33 (AMC), University of Amsterdam (UvA), Amsterdam, the Netherlands.  
34  
35

36  
37  
38 **Keywords:** Trial registration, Publication bias, Outcome reporting bias.  
39

40  
41 **Word count:** 2841  
42  
43  
44  
45  
46  
47  
48  
49  
50  
51  
52  
53  
54  
55  
56  
57  
58  
59  
60

## ABSTRACT

**Objectives:** To identify the proportion of articles reporting on test accuracy for which the corresponding study had been registered.

**Design:** Analysis of a consecutive sample of published study reports.

**Participants:** PubMed was searched for publications in journals with an impact factor of 5 or higher in May and June 2012. Articles were included if they reported on original studies evaluating the accuracy of one or more diagnostic or prognostic tests or markers against a clinical reference standard in humans.

**Primary and secondary outcome measures:** Primary outcome was registration of the reported test accuracy study. We additionally explored study characteristics associated with registration.

**Results:** We found 1,941 references; 351 study reports fulfilled the inclusion criteria, of which 52 studies (15%) had been registered. Of these, 27 (52%) provided a registration number in the publication, and 12 (23%) provided a reference to the publication in the registry. Registration rates were similar for studies on diagnostic versus those on prognostic tests, and among studies on imaging tests versus those on laboratory techniques. Studies reporting some form of industry involvement were more often registered (33%) than studies reporting another source of funding (11%), and studies without a (reported) source of (external) funding (9%;  $p < 0.001$ ). Of the registered studies, 8 (15%) had been registered after completion, 14 were registered before initiation (27%), and 30 (58%) between initiation and completion. Only 16 (31%; 5% of the total sample) had registered the published primary outcome measures before completion.

**Conclusions:** Few test accuracy studies published in higher impact journals are registered. Only one in twenty-two of such studies register their primary outcomes before study completion. Because the reasons for registering studies that investigate medical interventions also apply to test accuracy studies, prospective study registration of these studies should be further promoted among investigators and journal editors.

**ARTICLE SUMMARY****Strengths and limitations of this study**

- Response rates were relatively good: 58% of the corresponding authors participated in our email survey.
- As test accuracy studies often do not report the study completion date, we may have included studies completed before 2005, when ICMJE's registration policy was launched.
- Only papers published in journals with an impact factor of 5 or higher were included; registration rates may differ for study reports in lower-impact journals.



## INTRODUCTION

Since September 2005, the International Committee of Medical Journal Editors (ICMJE) requires researchers to register essential information about the design of their randomised controlled trials in a publicly available trial registry before enrolment of the first patient<sup>1</sup>. By facilitating transparency and completeness of reporting, this policy forms an important measure in preventing negative effects of publication bias and outcome reporting bias, defined as the non-publication and selective reporting of research findings depending on the strength and direction of outcomes<sup>2,3</sup>. This requirement improves the evidence base on which clinical decisions are made. Furthermore, duplication of research efforts can be prevented, research and knowledge gaps can be identified, collaboration can be facilitated, and a more efficient allocation of research funds can be promoted. Full disclosure of study material may also be an ethical obligation, especially to human study participants and future patients.

The ICMJE required registration of “any research project that prospectively assigns human subjects to intervention and comparison groups to study the cause-and-effect relationship between a medical intervention and a health outcome”<sup>4</sup>. The reasons for registration also apply to studies quantifying the accuracy of diagnostic and prognostic tests and markers<sup>5</sup>, especially since failure to publish and selective reporting may also be prevalent among these studies<sup>6,7</sup>. Approval and proper usage of medical tests should be based on a thorough scientific evaluation<sup>8</sup>. Test accuracy studies form an essential part in this process. Such studies evaluate the ability of a test to correctly differentiate between patients with and without a target condition. This can be a disease (screening or diagnosis), a disease stage (staging), a condition in the near future (monitoring and surveillance), response or benefit from therapy (predictive), or an event in the future (prognosis).

At present, many clinical trial registries also include studies that do not fall under ICMJE’s registration requirement. Although controversial<sup>9-11</sup>, increasing numbers of observational studies are also being registered<sup>12</sup>. This is illustrated by the fact that 19% out of 156,143 records in ClinicalTrials.gov, one of the major trial registries, are tagged as observational (accessed November 27, 2013).

Increasing numbers of test accuracy studies seem to be registered as well. Although most test accuracy studies can be considered as interventional, since consenting participants are prospectively assigned to one or more medical test, accuracy usually only contributes indirectly to changes in health outcomes. ICMJE’s registration requirement therefore seems to exclude test accuracy studies. The Food and Drug Administration (FDA), however, requires registration of “controlled trials with health outcomes of devices subject to FDA regulation,

1  
2  
3 other than small feasibility studies”<sup>13</sup>. This seems to imply that studies that indirectly  
4 contribute to health outcomes, such as test accuracy studies, should also be registered.  
5

6 The primary aim of this study was to identify the proportion of articles reporting on  
7 test accuracy studies for which the corresponding study had been registered, to evaluate  
8 whether registration had preceded study initiation, and to assess whether registration included  
9 the published primary outcome measures.  
10  
11  
12  
13  
14  
15  
16  
17  
18  
19  
20  
21  
22  
23  
24  
25  
26  
27  
28  
29  
30  
31  
32  
33  
34  
35  
36  
37  
38  
39  
40  
41  
42  
43  
44  
45  
46  
47  
48  
49  
50  
51  
52  
53  
54  
55  
56  
57  
58  
59  
60

## METHODS

### Search

A sample of test accuracy studies was identified by searching PubMed (National Library of Medicine). In May and June 2012, we searched for studies published in journals with an impact factor of 5 or higher. A previously validated search filter for test accuracy studies ("sensitivity AND specificity.sh" OR "specificit\*.tw" OR "false negative.tw" OR "accuracy.tw" (where ".sh" indicates subject heading and ".tw" indicates text word))<sup>14</sup> was combined with a list of names and corresponding international standard serial numbers (ISSN) of all the 536 journals that had been assigned an impact factor of 5 or higher in 2011. We applied this cut-off value because we expected the number of registered studies to be larger in higher-impact journals. This impact factor cut-off is in line with previously published analyses of test accuracy studies<sup>15,16</sup>. The final search was performed on February 25th, 2013.

Articles were included if they reported on studies evaluating the accuracy of one or more tests or markers against a clinical reference standard in human subjects. Tests for screening, diagnosis, staging, monitoring, prediction, or prognosis were all eligible. We limited our search to papers published in English that had an abstract. We excluded studies that did not report an accuracy measure (sensitivity, specificity, likelihood ratio, positive or negative predictive value, diagnostic odds ratio, area under operator curve, or c-index), as well as commentaries, discussion articles, and systematic reviews.

One author (DK) scanned the search results to identify potentially eligible articles. Studies that did not provide an accuracy measure in their abstract, but were deemed likely to publish one in their full-text, were also tagged as potentially eligible. The full text was then obtained to evaluate whether the study met the inclusion criteria. Two authors (DK, and PB or LH) independently evaluated the potentially eligible articles. Disagreements were resolved through discussion.

Included studies were classified as diagnostic studies, which evaluated the ability of a test to identify a current ((pre-)stage of) disease, or prognostic studies, which used a follow-up period to evaluate the ability of a test to predict a future state or event. Based on the test under investigation, included studies were tagged as imaging studies, laboratory studies, or other. Laboratory studies included all measurements on body fluids or tissues, except for histology and cytology (which were classified as "other"). We extracted the funding sources from the full publication. Studies that clearly described a source of support were categorized into those reporting some form of industry involvement and those reporting sources of funding not

1  
2  
3 including an industrial party. Studies that did not report a source of support, or only indicated  
4 that “no external funding” was obtained, were categorized as “no (external) funding  
5 reported”.  
6  
7

### 8 9 **Identifying registration**

10  
11 The following steps were taken to find out if a study had been registered. First, the full text of  
12 the included articles was checked for a trial registration number. When this number was not  
13 reported, the corresponding author was asked through email whether the study had been  
14 registered and, if so, in which registry and under which registration number. Contact attempts  
15 were limited to three emails, each sent a week apart. If no answer was received, the World  
16 Health Organization Search Portal, which searches several registries, was used. In addition,  
17 we searched ClinicalTrials.gov, the International Standard Randomized Controlled Trial  
18 Number Register, and national trial registers of the country of the first author. In these  
19 registries, we searched for the names of first, last and corresponding authors, publication title,  
20 evaluated tests, and target disease/outcome. We matched registered records with publications  
21 by comparing data on study design, sample size, country, outcomes and contact information.  
22 If no registration number was found, a study was considered as not registered. When a paper  
23 included in our review was a secondary (post-hoc) analysis, we also considered the study as  
24 registered if we were able to identify a registered record for the initial study, in which the data  
25 had been collected. We categorized studies as those where the data collection had, and those  
26 where the data collection had not been registered. We further classified studies with a  
27 registered data collection as those that had registered the published primary outcomes, those  
28 that had registered the published primary aim but vaguer, or slightly different, and those that  
29 had not registered the primary outcomes or aims.  
30  
31

32  
33 The following data were collected from the registry. First we checked whether the  
34 study had been registered before its initiation by comparing the registration date with the start  
35 and completion dates of participant enrolment as reported in the registry. Registration was  
36 defined as before initiation if the date of registration fell in or preceded the month of the  
37 study’s start date as reported in the registry. A study was considered as registered after  
38 completion if it had been registered in the same month as, or after the registered completion  
39 date. All other studies were considered as registered in-between initiation and completion. We  
40 also compared the published report with the registered record to find out in the published  
41 primary outcome had been registered.  
42  
43  
44  
45  
46  
47  
48  
49  
50  
51  
52  
53  
54  
55  
56  
57  
58  
59  
60

### Statistical analysis

Data are reported as frequencies and percentages. We used chi-square tests to evaluate associations between study characteristics and the chances of being registered for statistical significance. Data were analyzed using SPSS version 20.0.

For peer review only

## RESULTS

The search identified 1,941 articles of which 351 fulfilled the inclusion criteria (Figure 1). Characteristics of included studies are summarized in Table 1. The majority of studies (71%) evaluated the accuracy of a diagnostic test, while 29% evaluated a prognostic test. Comparable numbers of studies focused on imaging tests as on tests based on a laboratory technique: 33% and 36% respectively. The remainder focussed on another type of test (24%), such as physical examination, electrocardiography or pathology, or on (a combination of) tests that were assigned to more than one category (8%). Some form of industry involvement was reported by 19% of the included studies, while 58% reported sources of funding that did not include an industrial party. The remainder (23%) did not have or report an (external) source of funding.

The data collection had been registered in 52 of 351 studies (15%). Of these, 27 provided a registration number in the final publication. We contacted the authors of 324 studies without a registration number in their publication and 187 (58%) responded, providing another 14 registration numbers. Non-registration was confirmed by the authors of 173 studies. We searched the registries for the remaining 137 studies and identified another 11 registered records. Only four of the included studies had a randomized controlled design, and, of these, two (50%) had been registered.

Of the 52 registered studies, 27% had been registered before initiation (Table 2). The other studies were registered somewhere between the start and completion date (58%), or after the completion date (15%). Only 23% of the registered studies provided a reference to the full-publication in the registered record.

The proportion of registered studies for subgroups defined by study characteristics is shown in Table 1. There was no significant difference between diagnostic and prognostic test studies, nor between imaging and laboratory studies. Of the studies reporting some form of industry involvement, 33% had been registered. This was significantly more often than studies reporting another source of funding (11%), and studies without a (reported) source of funding (9%;  $p < 0.001$ ).

Only 16 (31%) registered studies had registered the published primary outcomes before the completion date. Among another 12 (23%), the published primary aim had been registered before the completion date, but it was described more vaguely or somewhat differently. Of the remaining studies, the published primary outcome or aim was not registered before study completion, or not registered at all. A majority in the latter group consisted of post-hoc analyses, in which the authors had used data from a registered,

1  
2  
3 previously completed study, and reports of substudies that were part of a larger registered  
4 project.  
5  
6  
7  
8  
9  
10  
11  
12  
13  
14  
15  
16  
17  
18  
19  
20  
21  
22  
23  
24  
25  
26  
27  
28  
29  
30  
31  
32  
33  
34  
35  
36  
37  
38  
39  
40  
41  
42  
43  
44  
45  
46  
47  
48  
49  
50  
51  
52  
53  
54  
55  
56  
57  
58  
59  
60

For peer review only

## DISCUSSION

Using a previously validated sensitive search filter, we found that the data collection of only fifteen percent of diagnostic and prognostic test accuracy studies published in journals with an impact factor of 5 or higher in May and June 2012 had been registered. Registration rates were comparable between studies of diagnostic and those of prognostic tests, and among studies of imaging tests and those on laboratory tests. Studies reporting some industry involvement were registered more often than studies with other sources of funding and studies without reported funding sources.

Adequate assessment of selective reporting among registered test accuracy studies proved difficult: only a quarter of the registered studies – four percent of all published studies – had been registered before initiation, and only one third of the registered studies – five percent of all published studies – had registered the published primary outcomes before the study completion date. About half of the registered studies reported a trial registration number in the publication, and a reference to the final publication was reported by a quarter of the registered studies.

Our study has some potential limitations. We only searched for test accuracy studies published in journals with an impact factor of 5 or higher. It is possible that studies published in these journals are more likely to be registered than those published in lower impact journals, in which case the fifteen percent is an overestimation of the proportion of all registered test accuracy studies.

We may have included studies initiated before 2005, when study registration was largely unknown among researchers. We were unable to exclude these because many test accuracy studies do not report their start and ending dates<sup>16;17</sup>. Since we only included studies published in May and June 2012, 7 years after the International Committee of Medical Journal Editors' (ICMJE) registration policy was launched, we expect this number to be negligible.

Although response rates to our email survey were relatively good, 42% of the study authors did not reply. We thoroughly searched several registries to identify a corresponding registration for these studies but may have missed some, especially since searching in most registries proves to be difficult, as extended search options are lacking. We included studies independent of their study design and type of data collection. We decided to do so because we wanted our study cohort to give a fair presentation of all types of test accuracy studies, and because of the inherent difficulties in categorizing test accuracy studies, due to scarce and



1  
2  
3 substandard reporting<sup>16-18</sup>. For example, many test accuracy studies do not report whether the  
4 study is prospective or retrospective<sup>16,17</sup>.

5  
6 Why are these results disappointing and promising at the same time? The results of our  
7 study indicate that, at this point, study registration for test accuracy studies does not provide  
8 many advantages. The number of registered studies is low, published primary outcomes are  
9 often not adequately registered, not registered in an informative way, and many registered  
10 studies are not registered before initiation. In addition, registration numbers are often not  
11 reported in the final publication, making it hard to find out if a study has been registered.  
12 References to the published study are often not reported in the registry, which does not  
13 facilitate finding out if a registered study has been published. We acknowledge that  
14 prospective registration of test accuracy studies is currently not officially required by the  
15 ICMJE. The fact that a considerable number of authors of these studies already seem to  
16 endorse the necessity of study registration is promising.  
17

18  
19 Study registration facilitates the identification of underexplored research areas, and the  
20 prevention of unnecessary duplication of research efforts and the corresponding waste of  
21 research funds. Full disclosure of all study material, including the protocol, is widely  
22 considered as an ethical obligation, especially to human study participants. Study registration  
23 also allows interested parties, such as reviewers, editors, physicians, policy makers, members  
24 of ethical committees, patients, and colleagues, to identify ongoing, unpublished and  
25 selectively published studies. Non-publication and selective reporting jeopardize evidence-  
26 based medicine mainly through skewed literature syntheses. Unpublished research results are  
27 not easy to find and include in a systematic review, and this may lead to faulty conclusions  
28 based on an incomplete evidence base. Selective reporting may generate bias, offering a too  
29 optimistic presentation of test performance. Both are widely recognized problems, especially  
30 among randomized controlled trials. Evidence of cohorts of studies registered in  
31 ClinicalTrials.gov suggests that only between 46% and 63% gets published<sup>19,20</sup>. Studies with  
32 positive or favourable results are more likely to be published than those with negative or  
33 disappointing ones<sup>21</sup>. Although formal evidence is scarce, these phenomena are also suspected  
34 to be prevalent among test accuracy studies<sup>5,6</sup>.

35  
36 In 2010, *Lancet* and *The BMJ* announced that they would, from then on, encourage  
37 researchers to register observational studies in a manner similar to what has become a  
38 requirement for clinical trials<sup>22,23</sup>. This caused some disapproving reactions<sup>11,24</sup>. Criticism  
39 especially focused on the fact that observational studies vary widely in their design, and that  
40 prospective registration is not as useful for one type of study as it is for the other<sup>25</sup>. Several of  
41  
42  
43  
44  
45  
46  
47  
48  
49  
50  
51  
52  
53  
54  
55  
56  
57  
58  
59  
60

1  
2  
3 these issues also apply to test accuracy studies. Study data can be collected prospectively or  
4 retrospectively, and study aims, hypotheses and protocols can be formulated before or after  
5 the analysis of the data. Some test accuracy studies are exploratory in nature. Such studies  
6 often do not have a pre-defined protocol or hypothesis, and existing datasets are used to  
7 explore potentially interesting findings. The benefits of study registration are not as clear for  
8 such studies. Although non-publication and selective reporting are likely to be more prevalent  
9 among exploratory studies, it would be impossible to find out whether the study had been  
10 registered before the post-hoc hypothesis was formulated. The bureaucratic load of  
11 prospectively registering every post-hoc analysis would be enormous and probably outweigh  
12 the benefits.  
13

14  
15  
16 More in general, all of the reasons for registering clinical trials seem to equally apply  
17 to interventional accuracy studies, and probably also to all protocol-driven test accuracy  
18 studies with a priori defined aims, irrespective of whether data collection was prospective or  
19 retrospective. Therefore, we strongly recommend that authors of such studies register their  
20 protocol before initiation, and that journal editors start to think about expanding required  
21 registration to this type of research.  
22  
23  
24  
25  
26  
27  
28  
29  
30  
31  
32  
33  
34  
35  
36  
37  
38  
39  
40  
41  
42  
43  
44  
45  
46  
47  
48  
49  
50  
51  
52  
53  
54  
55  
56  
57  
58  
59  
60

## ACKNOWLEDGEMENTS

We thank René Spijker, MSc (Dutch Cochrane Centre, University of Amsterdam) for assisting with the searches of this project.

### **Authors' contributions:**

DK developed the study design in consultation with PB and LH. DK, PB and LH performed the study selection. DK analyzed the data in consultation with PB and LH.

### **Data sharing:**

Full dataset and statistical code available from the corresponding author at [d.a.korevaar@amc.uva.nl](mailto:d.a.korevaar@amc.uva.nl).

## COMPETING INTERESTS

All authors have completed the ICMJE uniform disclosure form [www.icmje.org/coi\\_disclosure.pdf](http://www.icmje.org/coi_disclosure.pdf) and declare: no support from any organisation for the submitted work; no financial relationships with any organisations that might have an interest in the submitted work in the previous three years; no other relationships or activities that could appear to have influenced the submitted work.

## FUNDING

No external funding.

## References

- (1) DeAngelis CD, Drazen JM, Frizelle FA, et al. Clinical trial registration: a statement from the International Committee of Medical Journal Editors. *JAMA* 2004; 292(11):1363-1364.
- (2) Dickersin K. The existence of publication bias and risk factors for its occurrence. *JAMA* 1990; 263(10):1385-1389.
- (3) Sutton AJ, Egger M, Moher D. Addressing reporting biases. Cochrane Handbook for Systematic Reviews of Interventions ed. Chichester (UK): John Wiley & Sons; 2008.
- (4) De Angelis CD, Drazen JM, Frizelle FA, et al. Is this clinical trial fully registered?--A statement from the International Committee of Medical Journal Editors. *N Engl J Med* 2005; 352(23):2436-2438.
- (5) Hooft L, Bossuyt PM. Prospective registration of marker evaluation studies: time to act. *Clin Chem* 2011; 57(12):1684-1686.
- (6) Brazzelli M, Lewis SC, Deeks JJ, et al. No evidence of bias in the process of publication of diagnostic accuracy studies in stroke submitted as abstracts. *J Clin Epidemiol* 2009; 62(4):425-430.
- (7) Rifai N, Altman DG, Bossuyt PM. Reporting bias in diagnostic and prognostic studies: time for action. *Clin Chem* 2008; 54(7):1101-1103.
- (8) Moons KG, de Groot JA, Linnet K, et al. Quantifying the added value of a diagnostic test or marker. *Clin Chem* 2012; 58(10):1408-1417.
- (9) The registration of observational studies--when metaphors go bad. *Epidemiology* 2010; 21(5):607-609.
- (10) Lash TL. Preregistration of study protocols is unlikely to improve the yield from our science, but other strategies might. *Epidemiology* 2010; 21(5):612-613.
- (11) Vandembroucke JP. Registering observational research: second thoughts. *Lancet* 2010; 375(9719):982-983.
- (12) Williams RJ, Tse T, Harlan WR, et al. Registration of observational studies: is it time? *CMAJ* 2010; 182(15):1638-1642.
- (13) Food and Drug Administration Amendments Act of 2007 . 2013.
- (14) Deville WL, Bezemer PD, Bouter LM. Publications on diagnostic test evaluation in family medicine journals: an optimal search strategy. *J Clin Epidemiol* 2000; 53(1):65-69.
- (15) Ochodo EA, de Haan MC, Reitsma JB, et al. Overinterpretation and misreporting of diagnostic accuracy studies: evidence of "spin". *Radiology* 2013; 267(2):581-588.
- (16) Smidt N, Rutjes AW, van der Windt DA, et al. The quality of diagnostic accuracy studies since the STARD statement: has it improved? *Neurology* 2006; 67(5):792-797.

- 1  
2  
3 (17) Wilczynski NL. Quality of reporting of diagnostic accuracy studies: no change since  
4 STARD statement publication--before-and-after study. *Radiology* 2008; 248(3):817-  
5 823.  
6  
7 (18) Fontela PS, Pant PN, Schiller I, et al. Quality and reporting of diagnostic accuracy  
8 studies in TB, HIV and malaria: evaluation using QUADAS and STARD standards.  
9 *PLoS One* 2009; 4(11):e7753.  
10  
11 (19) Bourgeois FT, Murthy S, Mandl KD. Outcome reporting among drug trials registered  
12 in ClinicalTrials.gov. *Ann Intern Med* 2010; 153(3):158-166.  
13  
14 (20) Ross JS, Mulvey GK, Hines EM, et al. Trial publication after registration in  
15 ClinicalTrials.Gov: a cross-sectional analysis. *PLoS Med* 2009; 6(9):e1000144.  
16  
17 (21) Song F, Parekh-Bhurke S, Hooper L, et al. Extent of publication bias in different  
18 categories of research cohorts: a meta-analysis of empirical studies. *BMC Med Res*  
19 *Methodol* 2009; 9:79.  
20  
21 (22) Loder E, Groves T, Macauley D. Registration of observational studies. *BMJ* 2010;  
22 340:c950.  
23  
24 (23) Should protocols for observational research be registered? *Lancet* 2010;  
25 375(9712):348.  
26  
27 (24) Pearce N. Registration of protocols for observational research is unnecessary and  
28 would do more harm than good. *Occup Environ Med* 2011; 68(2):86-88.  
29  
30 (25) Chavers S, Fife D, Wacholtz M, Stang P, Berlin J. Registration of Observational  
31 Studies: perspectives from an industry-based epidemiology group.  
32 *Pharmacoepidemiol Drug Saf* 2011; 20(10):1009-1013.  
33  
34  
35  
36  
37  
38  
39  
40  
41  
42  
43  
44  
45  
46  
47  
48  
49  
50  
51  
52  
53  
54  
55  
56  
57  
58  
59  
60

**Table 1.** Characteristics of included studies and the distribution of registered studies among different characteristics.

|                                              |                           | <b>Number</b>  | <b>Registered</b> |
|----------------------------------------------|---------------------------|----------------|-------------------|
| <b>Aim of study</b>                          | Diagnostic                | 248 (71%)      | 38 (15%)          |
|                                              | Prediction                | 103 (29%)      | 14 (14%)          |
| <b>Type of test evaluated</b>                | Imaging                   | 114 (33%)      | 22 (19%)          |
|                                              | Laboratory technique      | 126 (36%)      | 21 (17%)          |
|                                              | Other                     | 83 (24%)       | 6 (7%)            |
|                                              | Combination of categories | 28 (8%)        | 3 (11%)           |
| <b>Funding</b>                               | Industry-involvement      | 67 (19%)       | 22 (33%)          |
|                                              | Other source of funding   | 203 (58%)      | 23 (11%)          |
|                                              | No funding (reported)     | 81 (23%)       | 7 (9%)            |
| <b>Journal impact factor, median (range)</b> |                           | 6.4 (5.0-53.3) | 6.0 (5.1-38.3)    |
| <b>Total</b>                                 |                           | 351            | 52 (15%)          |

The third column shows numbers and percentages of the total of included studies in parentheses. The second column shows numbers and percentages of the total per category in parentheses.

**Table 2.** Characteristics of registered studies.

|                                                                                 |                   | <b>Total</b><br>N=52 |
|---------------------------------------------------------------------------------|-------------------|----------------------|
| <b>Registration:</b>                                                            | Before initiation | 14 (27%)             |
|                                                                                 | In-between        | 30 (58%)             |
|                                                                                 | After completion  | 8 (15%)              |
| <b>Registration number reported</b>                                             |                   | 27 (52%)             |
| <b>Reference to full-publication provided in registry</b>                       |                   | 12 (23%)             |
| <b>Published primary outcomes registered clearly and before completion date</b> |                   | 16 (31%)             |

1  
2  
3  
4  
5  
6  
7  
8  
9  
10  
11  
12  
13  
14  
15  
16  
17  
18  
19  
20  
21  
22  
23  
24  
25  
26  
27  
28  
29  
30  
31  
32  
33  
34  
35  
36  
37  
38  
39  
40  
41  
42  
43  
44  
45  
46  
47  
48  
49  
50  
51  
52  
53  
54  
55  
56  
57  
58  
59  
60

**Figure legend**

**Figure 1.** Flowchart, showing how the papers entered the study.

For peer review only



1  
2  
3 **Infrequent and Incomplete Registration of Test Accuracy Studies: Analysis of Recent**  
4 **Study Reports**  
5

6  
7  
8 Authors: Daniël A. Korevaar, Patrick M.M. Bossuyt, Lotty Hooft.  
9

10  
11 Daniël A. Korevaar, MD (corresponding author).

12 Department of Clinical Epidemiology, Biostatistics and Bioinformatics (KEBB), Academic  
13 Medical Centre (AMC), University of Amsterdam (UvA), Meibergdreef 9, 1105 AZ,  
14 Amsterdam, the Netherlands.  
15

16  
17 E-mail: d.a.korevaar@amc.uva.nl

18  
19 Phone: 0031 20566 1099

20  
21 Fax: 0031 20691 2683  
22  
23

24  
25 Patrick M.M. Bossuyt, PhD.

26 Department of Clinical Epidemiology, Biostatistics and Bioinformatics (KEBB), Academic  
27 Medical Centre (AMC), University of Amsterdam (UvA), Amsterdam, the Netherlands.  
28  
29

30  
31 Lotty Hooft, PhD.

32 Netherlands Trial Register and Dutch Cochrane Centre (DCC), Academic Medical Centre  
33 (AMC), University of Amsterdam (UvA), Amsterdam, the Netherlands.  
34  
35

36  
37  
38 **Keywords:** Trial registration, Publication bias, Outcome reporting bias.  
39

40  
41 **Word count:** 2841  
42  
43  
44  
45  
46  
47  
48  
49  
50  
51  
52  
53  
54  
55  
56  
57  
58  
59  
60

**ABSTRACT**

**Objectives:** To identify the proportion of articles reporting on test accuracy for which the corresponding study had been registered.

**Design:** Analysis of a consecutive sample of published study reports.

**Participants:** PubMed was searched for publications in journals with an impact factor of 5 or higher in May and June 2012. Articles were included if they reported on original studies evaluating the accuracy of one or more diagnostic or prognostic tests or markers against a clinical reference standard in humans.

**Primary and secondary outcome measures:** Primary outcome was registration of the reported test accuracy study. We additionally explored study characteristics associated with registration.

**Results:** We found 1,941 references; 351 study reports fulfilled the inclusion criteria, of which 52 studies (15%) had been registered. Of these, 27 (52%) provided a registration number in the publication, and 12 (23%) provided a reference to the publication in the registry. Registration rates were similar for studies on diagnostic versus those on prognostic tests, and among studies on imaging tests versus those on laboratory techniques. Studies reporting some form of industry involvement were more often registered (33%) than studies reporting another source of funding (11%), and studies without a (reported) source of (external) funding (9%;  $p<0.001$ ). Of the registered studies, 8 (15%) had been registered after completion, 14 were registered before initiation (27%), and 30 (58%) between initiation and completion. Only 16 (31%; 5% of the total sample) had registered the published primary outcome measures before completion.

**Conclusions:** Few test accuracy studies published in higher impact journals are registered. Only one in twenty-two of such studies register their primary outcomes before study completion. Because the reasons for registering studies that investigate medical interventions also apply to test accuracy studies, prospective study registration of these studies should be further promoted among investigators and journal editors.

## ARTICLE SUMMARY

### Strengths and limitations of this study

- Response rates were relatively good: 58% of the corresponding authors participated in our email survey.
- As test accuracy studies often do not report the study completion date, we may have included studies completed before 2005, when ICMJE's registration policy was launched.
- Only papers published in journals with an impact factor of 5 or higher were included; registration rates may differ for study reports in lower-impact journals.

## INTRODUCTION

Since September 2005, the International Committee of Medical Journal Editors (ICMJE) requires researchers to register essential information about the design of their randomised controlled trials in a publicly available trial registry [before enrolment of the first patient](#)<sup>1</sup>. By facilitating transparency and completeness of reporting, this policy forms an important measure in preventing negative effects of publication bias and outcome reporting bias, defined as the non-publication and selective reporting of research findings depending on the strength and direction of outcomes<sup>2,3</sup>. This requirement improves the evidence base on which clinical decisions are made. Furthermore, duplication of research efforts can be prevented, research and knowledge gaps can be identified, collaboration can be facilitated, and a more efficient allocation of research funds can be promoted. Full disclosure of study material may also be an ethical obligation, especially to human study participants and future patients.

The ICMJE required registration of “any research project that prospectively assigns human subjects to intervention and comparison groups to study the cause-and-effect relationship between a medical intervention and a health outcome”<sup>4</sup>. The reasons for registration also apply to studies quantifying the accuracy of diagnostic and prognostic tests and markers<sup>5</sup>, especially since failure to publish and selective reporting may also be prevalent among these studies<sup>6,7</sup>. Approval and proper usage of medical tests should be based on a thorough scientific evaluation<sup>8</sup>. Test accuracy studies form an essential part in this process. Such studies evaluate the ability of a test to correctly differentiate between patients with and without a target condition. This can be a disease (screening or diagnosis), a disease stage (staging), a condition in the near future (monitoring and surveillance), response or benefit from therapy (predictive), or an event in the future (prognosis).

At present, many clinical trial registries also include studies that do not fall under ICMJE’s registration requirement. Although controversial<sup>9-11</sup>, increasing numbers of observational studies are also being registered<sup>12</sup>. This is illustrated by the fact that 19% out of 156,143 records in ClinicalTrials.gov, one of the major trial registries, are tagged as observational (accessed November 27, 2013).

Increasing numbers of test accuracy studies seem to be registered as well. Although most test accuracy studies can be considered as interventional, [since consenting participants are prospectively assigned to one or more medical test, accuracy](#) usually only contributes indirectly to changes in health outcomes. ICMJE’s registration requirement therefore seems to exclude test accuracy studies. The Food and Drug Administration (FDA), however, requires registration of “controlled trials with health outcomes of devices subject to FDA regulation,

1  
2  
3 other than small feasibility studies”<sup>13</sup>. This seems to imply that studies that indirectly  
4 contribute to health outcomes, such as test accuracy studies, should also be registered.  
5

6 The primary aim of this study was to identify the proportion of articles reporting on  
7 test accuracy studies for which the corresponding study had been registered, to evaluate  
8 whether registration had preceded study initiation, and to assess whether registration included  
9 the published primary outcome measures.  
10  
11  
12  
13  
14  
15  
16  
17  
18  
19  
20  
21  
22  
23  
24  
25  
26  
27  
28  
29  
30  
31  
32  
33  
34  
35  
36  
37  
38  
39  
40  
41  
42  
43  
44  
45  
46  
47  
48  
49  
50  
51  
52  
53  
54  
55  
56  
57  
58  
59  
60

## METHODS

### Search

A sample of test accuracy studies was identified by searching PubMed (National Library of Medicine). In May and June 2012, we searched for studies published in journals with an impact factor of 5 or higher. A previously validated search filter for test accuracy studies ("sensitivity AND specificity.sh" OR "specificit\*.tw" OR "false negative.tw" OR "accuracy.tw" (where ".sh" indicates subject heading and ".tw" indicates text word))<sup>14</sup> was combined with a list of names and corresponding international standard serial numbers (ISSN) of all the 536 journals that had been assigned an impact factor of 5 or higher in 2011. We applied this cut-off value because we expected the number of registered studies to be larger in higher-impact journals. This impact factor cut-off is in line with previously published analyses of test accuracy studies<sup>15,16</sup>. The final search was performed on February 25th, 2013.

Articles were included if they reported on studies evaluating the accuracy of one or more tests or markers against a clinical reference standard in human subjects. Tests for screening, diagnosis, staging, monitoring, prediction, or prognosis were all eligible. We limited our search to papers published in English that had an abstract. We excluded studies that did not report an accuracy measure (sensitivity, specificity, likelihood ratio, positive or negative predictive value, diagnostic odds ratio, area under operator curve, or c-index), as well as commentaries, discussion articles, and systematic reviews.

One author (DK) scanned the search results to identify potentially eligible articles. Studies that did not provide an accuracy measure in their abstract, but were deemed likely to publish one in their full-text, were also tagged as potentially eligible. The full text was then obtained to evaluate whether the study met the inclusion criteria. Two authors (DK, and PB or LH) independently evaluated the potentially eligible articles. Disagreements were resolved through discussion.

Included studies were classified as diagnostic studies, which evaluated the ability of a test to identify a current ((pre-)stage of) disease, or prognostic studies, which used a follow-up period to evaluate the ability of a test to predict a future state or event. Based on the test under investigation, included studies were tagged as imaging studies, laboratory studies, or other. Laboratory studies included all measurements on body fluids or tissues, except for histology and cytology (which were classified as "other"). We extracted the funding sources from the full publication. Studies that clearly described a source of support were categorized into those reporting some form of industry involvement and those reporting sources of funding not

1  
2  
3 including an industrial party. Studies that did not report a source of support, or only indicated  
4 that “no external funding” was obtained, were categorized as “no (external) funding  
5 reported”.  
6  
7

### 8 9 **Identifying registration**

10  
11 The following steps were taken to find out if a study had been registered. First, the full text of  
12 the included articles was checked for a trial registration number. When this number was not  
13 reported, the corresponding author was asked through email whether the study had been  
14 registered and, if so, in which registry and under which registration number. Contact attempts  
15 were limited to three emails, each sent a week apart. If no answer was received, the World  
16 Health Organization Search Portal, which searches several registries, was used. In addition,  
17 we searched ClinicalTrials.gov, the International Standard Randomized Controlled Trial  
18 Number Register, and national trial registers of the country of the first author. In these  
19 registries, we searched for the names of first, last and corresponding authors, publication title,  
20 evaluated tests, and target disease/outcome. We matched registered records with publications  
21 by comparing data on study design, sample size, country, outcomes and contact information.  
22 If no registration number was found, a study was considered as not registered. When a paper  
23 included in our review was a secondary (post-hoc) analysis, we also considered the study as  
24 registered if we were able to identify a registered record for the initial study, in which the data  
25 had been collected. We categorized studies as those where the data collection had, and those  
26 where the data collection had not been registered. We further classified studies with a  
27 registered data collection as those that had registered the published primary outcomes, those  
28 that had registered the published primary aim but vaguer, or slightly different, and those that  
29 had not registered the primary outcomes or aims.  
30  
31

32  
33 The following data were collected from the registry. First we checked whether the  
34 study had been registered before its initiation by comparing the registration date with the start  
35 and completion dates of participant enrolment as reported in the registry. Registration was  
36 defined as before initiation if the date of registration fell in or preceded the month of the  
37 study’s start date as reported in the registry. A study was considered as registered after  
38 completion if it had been registered in the same month as, or after the registered completion  
39 date. All other studies were considered as registered in-between initiation and completion. We  
40 also compared the published report with the registered record to find out in the published  
41 primary outcome had been registered.  
42  
43  
44  
45  
46  
47  
48  
49  
50  
51  
52  
53  
54  
55  
56  
57  
58  
59  
60

**Statistical analysis**

Data are reported as frequencies and percentages. We used chi-square tests to evaluate associations between study characteristics and the chances of being registered for statistical significance. Data were analyzed using SPSS version 20.0.

For peer review only



## RESULTS

The search identified 1,941 articles of which 351 fulfilled the inclusion criteria (Figure 1). Characteristics of included studies are summarized in Table 1. The majority of studies (71%) evaluated the accuracy of a diagnostic test, while 29% evaluated a prognostic test. Comparable numbers of studies focused on imaging tests as on tests based on a laboratory technique: 33% and 36% respectively. The remainder focussed on another type of test (24%), such as physical examination, electrocardiography or pathology, or on (a combination of) tests that were assigned to more than one category (8%). Some form of industry involvement was reported by 19% of the included studies, while 58% reported sources of funding that did not include an industrial party. The remainder (23%) did not have or report an (external) source of funding.

The data collection had been registered in 52 of 351 studies (15%). Of these, 27 provided a registration number in the final publication. We contacted the authors of 324 studies without a registration number in their publication and 187 (58%) responded, providing another 14 registration numbers. Non-registration was confirmed by the authors of 173 studies. We searched the registries for the remaining 137 studies and identified another 11 registered records. Only four of the included studies had a randomized controlled design, and, of these, two (50%) had been registered.

Of the 52 registered studies, 27% had been registered before initiation (Table 2). The other studies were registered somewhere between the start and completion date (58%), or after the completion date (15%). Only 23% of the registered studies provided a reference to the full-publication in the registered record.

The proportion of registered studies for subgroups defined by study characteristics is shown in Table 1. There was no significant difference between diagnostic and prognostic test studies, nor between imaging and laboratory studies. Of the studies reporting some form of industry involvement, 33% had been registered. This was significantly more often than studies reporting another source of funding (11%), and studies without a (reported) source of funding (9%;  $p < 0.001$ ).

Only 16 (31%) registered studies had registered the published primary outcomes before the completion date. Among another 12 (23%), the published primary aim had been registered before the completion date, but it was described more vaguely or somewhat differently. Of the remaining studies, the published primary outcome or aim was not registered before study completion, or not registered at all. A majority in the latter group consisted of post-hoc analyses, in which the authors had used data from a registered,

1  
2  
3  
4  
5  
6  
7  
8  
9  
10  
11  
12  
13  
14  
15  
16  
17  
18  
19  
20  
21  
22  
23  
24  
25  
26  
27  
28  
29  
30  
31  
32  
33  
34  
35  
36  
37  
38  
39  
40  
41  
42  
43  
44  
45  
46  
47  
48  
49  
50  
51  
52  
53  
54  
55  
56  
57  
58  
59  
60

previously completed study, and reports of substudies that were part of a larger registered project.

For peer review only

## DISCUSSION

Using a previously validated sensitive search filter, we found that the data collection of only fifteen percent of diagnostic and prognostic test accuracy studies published in journals with an impact factor of 5 or higher in May and June 2012 had been registered. Registration rates were comparable between studies of diagnostic and those of prognostic tests, and among studies of imaging tests and those on laboratory tests. Studies reporting some industry involvement were registered more often than studies with other sources of funding and studies without reported funding sources.

Adequate assessment of selective reporting among registered test accuracy studies proved difficult: only a quarter of the registered studies – four percent of all published studies – had been registered before initiation, and only one third of the registered studies – five percent of all published studies – had registered the published primary outcomes before the study completion date. About half of the registered studies reported a trial registration number in the publication, and a reference to the final publication was reported by a quarter of the registered studies.

Our study has some potential limitations. We only searched for test accuracy studies published in journals with an impact factor of 5 or higher. It is possible that studies published in these journals are more likely to be registered than those published in lower impact journals, in which case the fifteen percent is an overestimation of the proportion of all registered test accuracy studies.

We may have included studies initiated before 2005, when study registration was largely unknown among researchers. We were unable to exclude these because many test accuracy studies do not report their start and ending dates<sup>16;17</sup>. Since we only included studies published [in May and June](#) 2012, 7 years after the International Committee of Medical Journal Editors' (ICMJE) registration policy was launched, we expect this number to be negligible.

Although response rates to our email survey were relatively good, 42% of the study authors did not reply. We thoroughly searched several registries to identify a corresponding registration for these studies but may have missed some, especially since searching in most registries proves to be difficult, as extended search options are lacking. We included studies independent of their study design and type of data collection. We decided to do so because we wanted our study cohort to give a fair presentation of all types of test accuracy studies, and because of the inherent difficulties in categorizing test accuracy studies, due to scarce and

1  
2  
3 substandard reporting<sup>16-18</sup>. For example, many test accuracy studies do not report whether the  
4 study is prospective or retrospective<sup>16,17</sup>.

5  
6 Why are these results disappointing and promising at the same time? The results of our  
7 study indicate that, at this point, study registration for test accuracy studies does not provide  
8 many advantages. The number of registered studies is low, published primary outcomes are  
9 often not adequately registered, not registered in an informative way, and many registered  
10 studies are not registered before initiation. In addition, registration numbers are often not  
11 reported in the final publication, making it hard to find out if a study has been registered.  
12 References to the published study are often not reported in the registry, which does not  
13 facilitate finding out if a registered study has been published. We acknowledge that  
14 prospective registration of test accuracy studies is currently not officially required by the  
15 ICMJE. The fact that a considerable number of authors of these studies already seem to  
16 endorse the necessity of study registration is promising.

17  
18  
19  
20  
21  
22  
23  
24 Study registration facilitates the identification of underexplored research areas, and the  
25 prevention of unnecessary duplication of research efforts and the corresponding waste of  
26 research funds. Full disclosure of all study material, including the protocol, is widely  
27 considered as an ethical obligation, especially to human study participants. Study registration  
28 also allows interested parties, such as reviewers, editors, physicians, policy makers, members  
29 of ethical committees, patients, and colleagues, to identify ongoing, unpublished and  
30 selectively published studies. Non-publication and selective reporting jeopardize evidence-  
31 based medicine mainly through skewed literature syntheses. Unpublished research results are  
32 not easy to find and include in a systematic review, and this may lead to faulty conclusions  
33 based on an incomplete evidence base. Selective reporting may generate bias, offering a too  
34 optimistic presentation of test performance. Both are widely recognized problems, especially  
35 among randomized controlled trials. Evidence of cohorts of studies registered in  
36 ClinicalTrials.gov suggests that only between 46% and 63% gets published<sup>19,20</sup>. Studies with  
37 positive or favourable results are more likely to be published than those with negative or  
38 disappointing ones<sup>21</sup>. Although formal evidence is scarce, these phenomena are also suspected  
39 to be prevalent among test accuracy studies<sup>5,6</sup>.

40  
41  
42  
43  
44  
45  
46  
47  
48  
49  
50  
51 In 2010, *Lancet* and *The BMJ* announced that they would, from then on, encourage  
52 researchers to register observational studies in a manner similar to what has become a  
53 requirement for clinical trials<sup>22,23</sup>. This caused some disapproving reactions<sup>11,24</sup>. Criticism  
54 especially focused on the fact that observational studies vary widely in their design, and that  
55 prospective registration is not as useful for one type of study as it is for the other<sup>25</sup>. Several of  
56  
57  
58  
59  
60

1  
2  
3 these issues also apply to test accuracy studies. Study data can be collected prospectively or  
4 retrospectively, and study aims, hypotheses and protocols can be formulated before or after  
5 the analysis of the data. Some test accuracy studies are exploratory in nature. Such studies  
6 often do not have a pre-defined protocol or hypothesis, and existing datasets are used to  
7 explore potentially interesting findings. The benefits of study registration are not as clear for  
8 such studies. Although non-publication and selective reporting are likely to be more prevalent  
9 among exploratory studies, it would be impossible to find out whether the study had been  
10 registered before the post-hoc hypothesis was formulated. The bureaucratic load of  
11 prospectively registering every post-hoc analysis would be enormous and probably outweigh  
12 the benefits.  
13

14  
15  
16  
17  
18  
19  
20 More in general, all of the reasons for registering clinical trials seem to equally apply  
21 to interventional accuracy studies, and probably also to all protocol-driven test accuracy  
22 studies with a priori defined aims, irrespective of whether data collection was prospective or  
23 retrospective. Therefore, we strongly recommend that authors of such studies register their  
24 protocol before initiation, and that journal editors start to think about expanding required  
25 registration to this type of research.  
26  
27  
28  
29  
30  
31  
32  
33  
34  
35  
36  
37  
38  
39  
40  
41  
42  
43  
44  
45  
46  
47  
48  
49  
50  
51  
52  
53  
54  
55  
56  
57  
58  
59  
60

## ACKNOWLEDGEMENTS

We thank René Spijker, MSc (Dutch Cochrane Centre, University of Amsterdam) for assisting with the searches of this project.

### Authors' contributions:

DK developed the study design in consultation with PB and LH. DK, PB and LH performed the study selection. DK analyzed the data in consultation with PB and LH.

### Data sharing:

Full dataset and statistical code available from the corresponding author at [d.a.korevaar@amc.uva.nl](mailto:d.a.korevaar@amc.uva.nl).

## COMPETING INTERESTS

All authors have completed the ICMJE uniform disclosure form [www.icmje.org/coi\\_disclosure.pdf](http://www.icmje.org/coi_disclosure.pdf) and declare: no support from any organisation for the submitted work; no financial relationships with any organisations that might have an interest in the submitted work in the previous three years; no other relationships or activities that could appear to have influenced the submitted work.

## FUNDING

No external funding.

## References

- 1  
2  
3  
4  
5 (1) DeAngelis CD, Drazen JM, Frizelle FA, Haug C, Hoey J, Horton R et al. Clinical trial  
6 registration: a statement from the International Committee of Medical Journal Editors.  
7 *JAMA* 2004; 292(11):1363-1364.  
8
- 9  
10 (2) Dickersin K. The existence of publication bias and risk factors for its occurrence.  
11 *JAMA* 1990; 263(10):1385-1389.  
12
- 13 (3) Sutton AJ, Egger M, Moher D. Addressing reporting biases. Cochrane Handbook for  
14 Systematic Reviews of Interventions ed. Chichester (UK): John Wiley & Sons; 2008.  
15
- 16 (4) De Angelis CD, Drazen JM, Frizelle FA, Haug C, Hoey J, Horton R et al. Is this  
17 clinical trial fully registered?--A statement from the International Committee of  
18 Medical Journal Editors. *N Engl J Med* 2005; 352(23):2436-2438.  
19
- 20 (5) Hooft L, Bossuyt PM. Prospective registration of marker evaluation studies: time to  
21 act. *Clin Chem* 2011; 57(12):1684-1686.  
22
- 23 (6) Brazzelli M, Lewis SC, Deeks JJ, Sandercock PA. No evidence of bias in the process  
24 of publication of diagnostic accuracy studies in stroke submitted as abstracts. *J Clin*  
25 *Epidemiol* 2009; 62(4):425-430.  
26
- 27 (7) Rifai N, Altman DG, Bossuyt PM. Reporting bias in diagnostic and prognostic  
28 studies: time for action. *Clin Chem* 2008; 54(7):1101-1103.  
29
- 30 (8) Moons KG, de Groot JA, Linnet K, Reitsma JB, Bossuyt PM. Quantifying the added  
31 value of a diagnostic test or marker. *Clin Chem* 2012; 58(10):1408-1417.  
32
- 33 (9) The registration of observational studies--when metaphors go bad. *Epidemiology*  
34 2010; 21(5):607-609.  
35
- 36 (10) Lash TL. Preregistration of study protocols is unlikely to improve the yield from our  
37 science, but other strategies might. *Epidemiology* 2010; 21(5):612-613.  
38
- 39 (11) Vandembroucke JP. Registering observational research: second thoughts. *Lancet* 2010;  
40 375(9719):982-983.  
41
- 42 (12) Williams RJ, Tse T, Harlan WR, Zarin DA. Registration of observational studies: is it  
43 time? *CMAJ* 2010; 182(15):1638-1642.  
44
- 45 (13) Food and Drug Administration Amendments Act of 2007 . 2013.  
46
- 47 (14) Deville WL, Bezemer PD, Bouter LM. Publications on diagnostic test evaluation in  
48 family medicine journals: an optimal search strategy. *J Clin Epidemiol* 2000;  
49 53(1):65-69.  
50
- 51 (15) Ochodo EA, de Haan MC, Reitsma JB, Hooft L, Bossuyt PM, Leeflang MM.  
52 Overinterpretation and misreporting of diagnostic accuracy studies: evidence of  
53 "spin". *Radiology* 2013; 267(2):581-588.  
54  
55  
56  
57  
58  
59  
60

- 1  
2  
3 (16) Smidt N, Rutjes AW, van der Windt DA, Ostelo RW, Bossuyt PM, Reitsma JB et al.  
4 The quality of diagnostic accuracy studies since the STARD statement: has it  
5 improved? *Neurology* 2006; 67(5):792-797.  
6  
7 (17) Wilczynski NL. Quality of reporting of diagnostic accuracy studies: no change since  
8 STARD statement publication--before-and-after study. *Radiology* 2008; 248(3):817-  
9 823.  
10  
11 (18) Fontela PS, Pant PN, Schiller I, Dendukuri N, Ramsay A, Pai M. Quality and  
12 reporting of diagnostic accuracy studies in TB, HIV and malaria: evaluation using  
13 QUADAS and STARD standards. *PLoS One* 2009; 4(11):e7753.  
14  
15 (19) Bourgeois FT, Murthy S, Mandl KD. Outcome reporting among drug trials registered  
16 in ClinicalTrials.gov. *Ann Intern Med* 2010; 153(3):158-166.  
17  
18 (20) Ross JS, Mulvey GK, Hines EM, Nissen SE, Krumholz HM. Trial publication after  
19 registration in ClinicalTrials.Gov: a cross-sectional analysis. *PLoS Med* 2009;  
20 6(9):e1000144.  
21  
22 (21) Song F, Parekh-Bhurke S, Hooper L, Loke YK, Ryder JJ, Sutton AJ et al. Extent of  
23 publication bias in different categories of research cohorts: a meta-analysis of  
24 empirical studies. *BMC Med Res Methodol* 2009; 9:79.  
25  
26 (22) Loder E, Groves T, Macauley D. Registration of observational studies. *BMJ* 2010;  
27 340:c950.  
28  
29 (23) Should protocols for observational research be registered? *Lancet* 2010;  
30 375(9712):348.  
31  
32 (24) Pearce N. Registration of protocols for observational research is unnecessary and  
33 would do more harm than good. *Occup Environ Med* 2011; 68(2):86-88.  
34  
35 (25) Chavers S, Fife D, Wacholtz M, Stang P, Berlin J. Registration of Observational  
36 Studies: perspectives from an industry-based epidemiology group.  
37 *Pharmacoepidemiol Drug Saf* 2011; 20(10):1009-1013.  
38  
39  
40  
41  
42  
43  
44  
45  
46  
47  
48  
49  
50  
51  
52  
53  
54  
55  
56  
57  
58  
59  
60



**Table 1.** Characteristics of included studies and the distribution of registered studies among different characteristics.

|                                              |                           | <b>Number</b>  | <b>Registered</b> |
|----------------------------------------------|---------------------------|----------------|-------------------|
| <b>Aim of study</b>                          | Diagnostic                | 248 (71%)      | 38 (15%)          |
|                                              | Prediction                | 103 (29%)      | 14 (14%)          |
| <b>Type of test evaluated</b>                | Imaging                   | 114 (33%)      | 22 (19%)          |
|                                              | Laboratory technique      | 126 (36%)      | 21 (17%)          |
|                                              | Other                     | 83 (24%)       | 6 (7%)            |
|                                              | Combination of categories | 28 (8%)        | 3 (11%)           |
| <b>Funding</b>                               | Industry-involvement      | 67 (19%)       | 22 (33%)          |
|                                              | Other source of funding   | 203 (58%)      | 23 (11%)          |
|                                              | No funding (reported)     | 81 (23%)       | 7 (9%)            |
| <b>Journal impact factor, median (range)</b> |                           | 6.4 (5.0-53.3) | 6.0 (5.1-38.3)    |
| <b>Total</b>                                 |                           | 351            | 52 (15%)          |

The third column shows numbers and percentages of the total of included studies in parentheses. The second column shows numbers and percentages of the total per category in parentheses.

**Table 2.** Characteristics of registered studies.

|                                                                                 |                   | <b>Total</b><br>N=52 |
|---------------------------------------------------------------------------------|-------------------|----------------------|
| <b>Registration:</b>                                                            | Before initiation | 14 (27%)             |
|                                                                                 | In-between        | 30 (58%)             |
|                                                                                 | After completion  | 8 (15%)              |
| <b>Registration number reported</b>                                             |                   | 27 (52%)             |
| <b>Reference to full-publication provided in registry</b>                       |                   | 12 (23%)             |
| <b>Published primary outcomes registered clearly and before completion date</b> |                   | 16 (31%)             |

For peer review only

1  
2  
3 **Figure 1.** Flowchart, showing how the papers entered the study.  
4  
5  
6  
7  
8  
9  
10  
11  
12  
13  
14  
15  
16  
17  
18  
19  
20  
21  
22  
23  
24  
25  
26  
27  
28  
29  
30  
31  
32  
33  
34  
35  
36  
37  
38  
39  
40  
41  
42  
43  
44  
45  
46  
47  
48  
49  
50  
51  
52  
53  
54  
55  
56  
57  
58  
59  
60

For peer review only

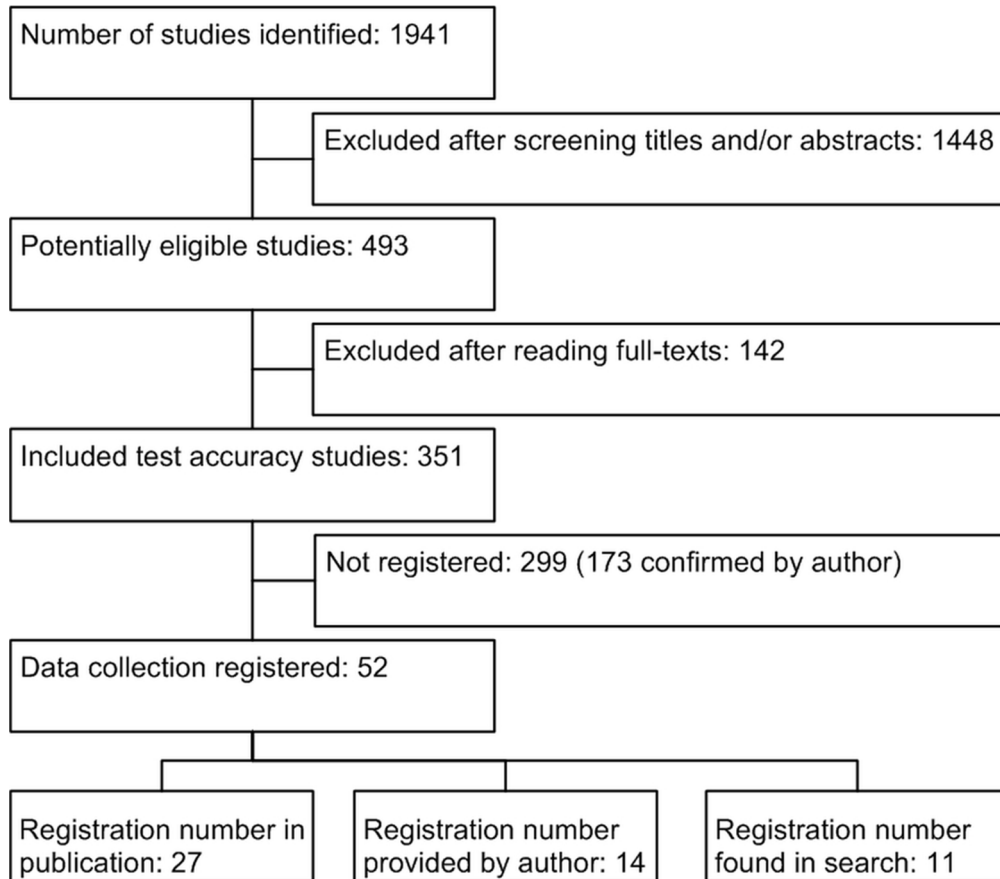

Flowchart, showing how the papers entered the study.  
94x90mm (300 x 300 DPI)

only
